# Supplementary material
Source: publisher figshare collection journal article supplement (https://springernature.figshare.com/ndownloader/files/20498103)
Supplement: Supplementary file [file 20498103]

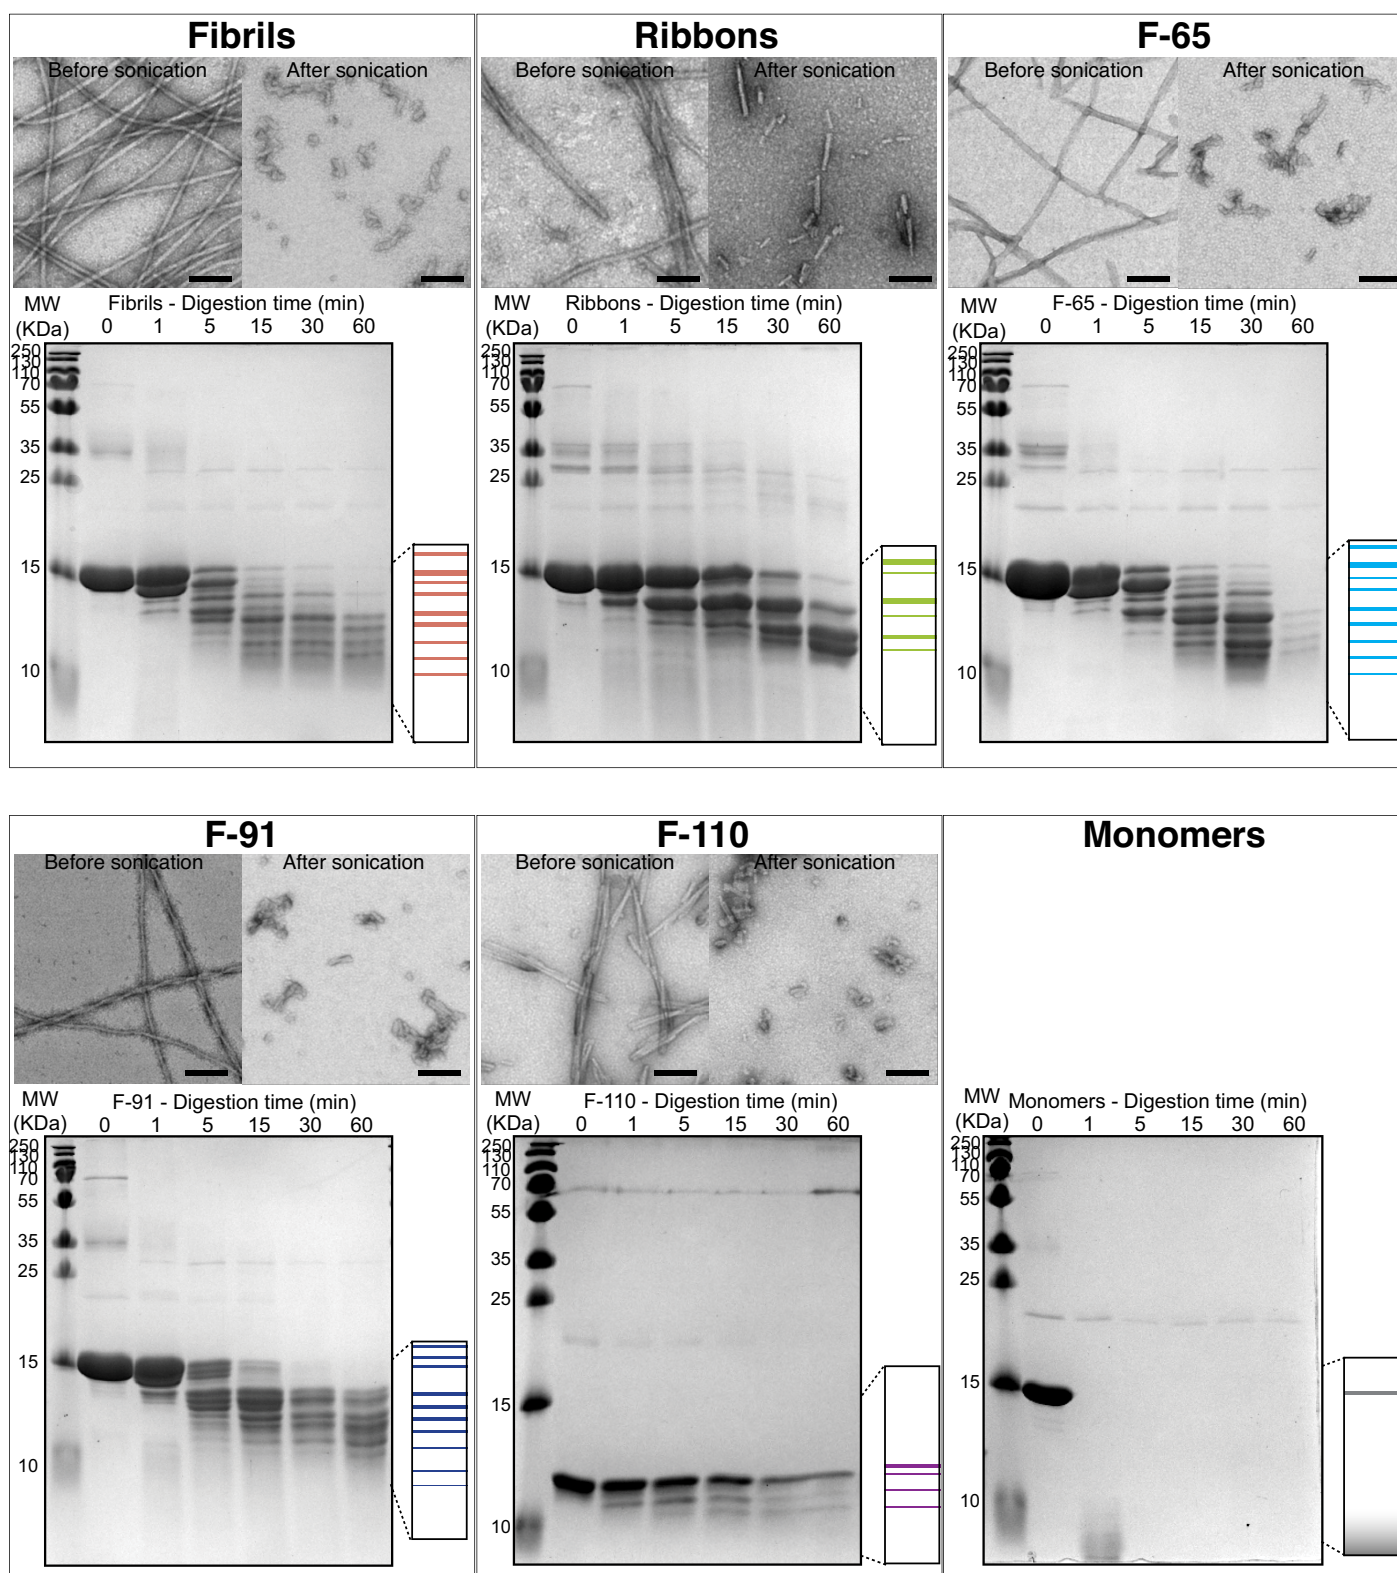

### Additional file 1: Quality control of the assemblies

The quality of the assemblies was verified by electron microscopy, and by checking limited proteolysis profiles. Transmission electron microscopy (TEM) images of the assemblies were obtained after negative-staining by uranyl acetate. Scale bar: 200 nm

Proteinase-K digested samples collected from 0 to 60 min after addition of protease are visualized after migration on SDS-PAGE (15%) and Coomassie staining. Next to the gels, we represented the proteolysis profile (10 to 15 KDa) as a “barcode” that is specific and unique to each strain.
